# Supplementary material for: Host immune responses induced by specific Mycobacterium leprae antigens in an overnight whole-blood assay correlate with the diagnosis of paucibacillary leprosy patients in China
Source: PubMed Central journal article supplement (PMC6481774; doi:10.1371/journal.pntd.0007318), 2019-04-24
Supplement: pntd.0007318.s008.pdf [file pntd.0007318.s008.pdf]

| ML antigen              | ML2044 | LID-1              | ML2044          | Final test result |
|-------------------------|--------|--------------------|-----------------|-------------------|
| Host markers            | IL-4   | G-CSF              | CCL4/MIP-1 beta |                   |
| PB1                     |        |                    |                 |                   |
| PB2                     |        |                    |                 |                   |
| PB3                     |        |                    |                 |                   |
| PB4                     |        |                    |                 |                   |
| PB5                     |        |                    |                 |                   |
| PB6                     |        |                    |                 |                   |
| PB7                     |        |                    |                 |                   |
| HHC1                    |        |                    |                 |                   |
| HHC2                    |        |                    |                 |                   |
| HHC3                    |        |                    |                 |                   |
| HHC4                    |        |                    |                 |                   |
| HHC5                    |        |                    |                 |                   |
| HHC6                    |        |                    |                 |                   |
| HHC7                    |        |                    |                 |                   |
| HHC8                    |        |                    |                 |                   |
| HHC9                    |        |                    |                 |                   |
| HHC10                   |        |                    |                 |                   |
| HHC11                   |        |                    |                 |                   |
| HHC12                   |        |                    |                 |                   |
| HHC13                   |        |                    |                 |                   |
| HHC14                   |        |                    |                 |                   |
| HHC15                   |        |                    |                 |                   |
| HHC16                   |        |                    |                 |                   |
| HHC17                   |        |                    |                 |                   |
| HHC18                   |        |                    |                 |                   |
| HHC19                   |        |                    |                 |                   |
| HHC20                   |        |                    |                 |                   |
| HHC21                   |        |                    |                 |                   |
| Marker indicates PB     |        | 1 false negative   |                 |                   |
| Marker indicates no PB  |        | 1 false positive   |                 |                   |
| Testing indicates no PB |        | Sensitivity 85.71% |                 |                   |
| Testing indicates PB    |        | Specificity 100%   |                 |                   |
