# Supplementary material for: Host immune responses induced by specific Mycobacterium leprae antigens in an overnight whole-blood assay correlate with the diagnosis of paucibacillary leprosy patients in China
Source: PubMed Central journal article supplement (PMC6481774; doi:10.1371/journal.pntd.0007318), 2019-04-24
Supplement: pntd.0007318.s009.pdf [file pntd.0007318.s009.pdf]

| ML antigen              | ML2044             | ML2044          | ML2044 | Final test result |       |
|-------------------------|--------------------|-----------------|--------|-------------------|-------|
| Host markers            | CXCL8              | CCL4/MIP-1 beta | IL-4   |                   |       |
| PB1                     |                    |                 |        | Black             |       |
| PB2                     |                    |                 |        |                   |       |
| PB3                     |                    |                 |        |                   |       |
| PB4                     |                    |                 |        |                   |       |
| PB5                     |                    |                 |        |                   |       |
| PB6                     |                    |                 |        |                   |       |
| PB7                     |                    |                 |        |                   |       |
| TB1                     |                    |                 |        | White             |       |
| TB2                     |                    |                 |        |                   |       |
| TB3                     |                    |                 |        |                   |       |
| TB4                     |                    |                 |        |                   |       |
| TB5                     |                    |                 |        |                   |       |
| TB6                     |                    |                 |        |                   |       |
| TB7                     |                    |                 |        |                   | Black |
| TB8                     |                    |                 |        |                   |       |
| TB9                     |                    |                 |        |                   |       |
| TB10                    |                    |                 |        |                   |       |
| TB11                    |                    |                 |        |                   |       |
| TB12                    |                    |                 |        |                   |       |
| TB13                    |                    |                 |        |                   |       |
| TB14                    |                    |                 |        |                   |       |
| TB15                    |                    |                 |        |                   |       |
| TB16                    |                    |                 |        |                   |       |
| TB17                    |                    |                 |        |                   |       |
| TB18                    |                    |                 |        |                   |       |
| TB19                    |                    |                 |        |                   |       |
| Marker indicates PB     | 0 false negative   |                 |        |                   |       |
| Marker indicates no PB  | 1 false positive   |                 |        |                   |       |
| Testing indicates no PB | Sensitivity 100%   |                 |        |                   |       |
| Testing indicates PB    | Specificity 94.74% |                 |        |                   |       |
